## RESEARCH ARTICLE

# The origin and loss of periodic patterning in the turtle shell

Jacqueline E. Moustakas-Verho<sup>1,\*</sup>, Roland Zimm<sup>1</sup>, Judith Cebra-Thomas<sup>2</sup>, Netta K. Lempiäinen<sup>1</sup>, Aki Kallonen<sup>3</sup>, Katherine L. Mitchell<sup>4</sup>, Keijo Hämäläinen<sup>3</sup>, Isaac Salazar-Ciudad<sup>1,5</sup>, Jukka Jernvall<sup>1</sup> and Scott F. Gilbert<sup>1,4,\*</sup>

**ABSTRACT**

The origin of the turtle shell over 200 million years ago greatly modified the amniote body plan, and the morphological plasticity of the shell has promoted the adaptive radiation of turtles. The shell, comprising a dorsal carapace and a ventral plastron, is a layered structure formed by basal endochondral axial skeletal elements (ribs, vertebrae) and plates of bone, which are overlain by keratinous ectodermal scutes. Studies of turtle development have mostly focused on the bones of the shell; however, the genetic regulation of the epidermal scutes has not been investigated. Here, we show that scutes develop from an array of patterned placodes and that these placodes are absent from a soft-shelled turtle in which scutes were lost secondarily. Experimentally inhibiting *Shh*, *Bmp* or *Fgf* signaling results in the disruption of the placodal pattern. Finally, a computational model is used to show how two coupled reaction-diffusion systems reproduce both natural and abnormal variation in turtle scutes. Taken together, these placodal signaling centers are likely to represent developmental modules that are responsible for the evolution of scutes in turtles, and the regulation of these centers has allowed for the diversification of the turtle shell.

**KEY WORDS:** *Shh*, Ectodermal appendage, Placode, Scute, Turtle

**INTRODUCTION**

Recent studies of turtle development and paleontology (Cebra-Thomas et al., 2005; Nagashima et al., 2007; Li et al., 2008; Moustakas, 2008; Sánchez-Villagra et al., 2009; Kawashima-Ohya et al., 2011; Kuratani et al., 2011; Hirasawa et al., 2013) have advanced our understanding of the evolutionary origin of turtles and the genetic and cellular interactions that regulate various aspects of bone development in the carapace. However, the genetic regulation of the origin and evolution of the epidermal scutes has not been addressed. Scutes are plate-like keratinous cutaneous appendages that grow radially and contiguously in the epidermis (Alibardi, 2006), and their presence is a basal trait in extant turtles, as they were present at least 210 million years ago in *Proganochelys* (Gaffney, 1990). Their tessellation and pigmentation are diagnostic to the species level, although they have been lost or reduced in certain freshwater (trionychid, *Natator*) and marine (*Dermochelys*) taxa. The epidermal layer of the hard-shelled slider turtle *Trachemys scripta* generally consists of 38 scutes in the carapace and 16 in the plastron. The bones of the turtle shell form later in development than

the scutes and have a pattern different from that of the scutes (Zangerl, 1969).

Turtle scutes, like feathers, are generally thought to have been derived from the reptilian scale (Maderson, 1972). Feathers, scales, teeth, hair and many exocrine glands develop as ectodermal appendages through epithelial-mesenchymal interaction. Consequently, turtle scutes have been proposed to develop from local epithelial thickenings called placodes (Cherepanov, 2006), although this remains to be demonstrated. Unlike scales, feathers and hair, turtle scutes grow radially within the plane of the epidermis. Turtle scutes, therefore, form modules that maintain their growth in apposition to one another and coordinate this growth with that of the underlying carapacial and plastral bones (Zangerl, 1969; Alibardi, 2005). To address the developmental origin and regulation of turtle scutes, we examined genes involved in their formation and used this information to construct a computational model to account for the dynamics of scute patterning.

**RESULTS****Scutes develop from an array of patterned placodes**

The first morphological indication of turtle shell development is the formation of the carapacial ridge at stage Yntema 14 (Y14) (Yntema, 1968). In *T. scripta*, our *in situ* analysis of the expression of bone morphogenetic protein 2 (*Bmp2*), sonic hedgehog (*Shh*), *Bmp4* and the *Bmp* target gene *Msx2* at stage Y16 showed the appearance of segmented domains along the carapacial ridge, as well as punctate domains of expression dorsally on the developing carapace and ventrally on the developing plastron (Fig. 1A; supplementary material Fig. S1). These domains coincided with thickenings of placodal ectoderm at sites of carapacial and plastral scute formation. The expression of the *Bmp* antagonist *Gremlin* appeared to be the negative image of these domains, forming the outline of the developing scutes (Fig. 1A). Detailed examination of gene expression patterns in histological sections showed that *Bmp2*, *Bmp4*, *Shh* and *Msx2* were expressed opposite the ribs in an overlapping pattern along the carapacial ridge (Fig. 1A; supplementary material Fig. S1). *Shh* was expressed more anteriorly in each marginal placode, and its expression overlapped with the more medially expressed *Bmp2*. The domain of *Bmp2* expression, in turn, overlapped with the expression domain of *Gremlin*, which was seen posterior to the ribs and opposite the anterior myotomes (Fig. 1A). To confirm that our interpretations were not affected by variation among individual specimens, we examined the expression of *Shh*, *Bmp2* and *Gremlin* on alternating sections of the placodes of the same individual followed by a three-dimensional (3D) analysis of the expression patterns. The results showed an overlapping chain of *Shh-Bmp2-Gremlin* expression (Fig. 1B), suggesting that at the level of molecular signaling, the separate scute primordia are already in apposition to each other.

**Scute placodes contour the carapacial ridge**

To further examine the structure of scute placodes, we performed a soft tissue X-ray micro-computed tomography analysis of developing

<sup>1</sup>Developmental Biology Program, Institute of Biotechnology, University of Helsinki, P.O. Box 56, Helsinki FIN-00014, Finland. <sup>2</sup>Biology Department, Millersville University, P.O. Box 1002, Millersville, PA 17551, USA. <sup>3</sup>Division of Materials Physics, Department of Physics, University of Helsinki, P.O. Box 64, Helsinki FIN-00014, Finland. <sup>4</sup>Biology Department, Swarthmore College, 500 College Avenue, Swarthmore, PA 19081, USA. <sup>5</sup>Departament de Genètica i Microbiologia, Universitat Autònoma de Barcelona, 08193 Cerdanyola del Vallès, Barcelona, Spain.

\*Authors for correspondence (jacqueline.moustakas@helsinki.fi; sgilber1@swarthmore.edu)

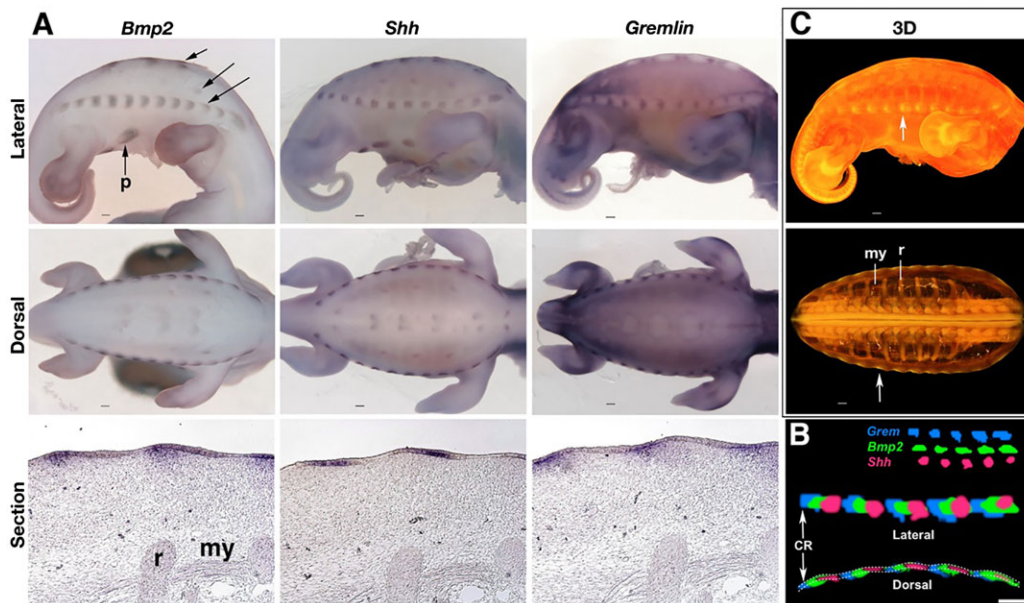

**Fig. 1. Expression of *Bmp2*, *Shh* and *Gremlin* viewed laterally, dorsally, and in section in stage Y16 *T. scripta* embryos.** (A) *Bmp2* and *Shh* have overlapping expression patterns in the placodal regions (black arrows) that will form the scutes of the turtle shell, whereas *Gremlin* expression appears as the negative image of these domains. (B) 3D reconstruction of developing scutes along the carapacial ridge (CR) from alternate serial sections of the same individual placodes shows an overlapping chain of *Shh* (red), *Bmp2* (green) and *Gremlin* (blue) expression. (C) 3D reconstruction of this stage from soft tissue X-ray micro-computed tomographs shows higher densities in the placodal epithelium of the developing scutes (white arrow) opposite the myotomes. Anterior is toward the right for specimens. Scale bars: 200  $\mu$ m. p, plastral scute placode; r, rib; my, myotome.

turtles that enables the visualization of tissue condensations (Metscher, 2009). Marginal scute placodes showed the greatest density differences, or contrast, in the epithelium opposite the myotomes (Fig. 1C). Although the carapacial ridge has traditionally been described as a columnar epithelium overlying a condensed mesenchyme (Burke, 1989), we found a periodicity whereby only the epithelium opposite the myotomes is columnar after scute development has begun (supplementary material Movie 1).

### Evolutionary and experimental loss of scutes

The importance of these placodal signaling centers for scute development can be tested by studying turtles in which scutes are absent naturally. The aquatic Chinese soft-shelled turtle *Pelodiscus sinensis* does not have keratinized scutes and instead forms a leathery skin. We examined *Pelodiscus* embryos at stages Tokita-Kuratani 15 and 16 (TK15-16) (Tokita and Kuratani, 2001) for their gene expression patterns and scute placodes. These stages are comparable to the same stages of *T. scripta* embryos that we examined above. The results showed that *Pelodiscus* embryos lack the punctate expression of *Shh*, *Bmp2*, *Bmp4*, *Gremlin* and *Msx2* that was seen dorsally and marginally in the hard-shelled turtle *T. scripta*. Instead, these genes in *Pelodiscus* were expressed in a thin layer around the carapacial ridge, delineating the perimeter of the developing carapace (Fig. 2A-C; supplementary material Fig. S2). Moreover, the carapacial ridge margin remained unscalloped and scute formation was not initiated.

We next tested experimentally whether disruption of these signaling pathways would affect the patterning of scutes. In cultured *T. scripta* embryos that had been treated with an inhibitor of hedgehog (Hh) signaling [cyclopamine (cyc)] (Chen et al., 2002) or an inhibitor of Bmp signaling (LDN193189) (Cuny et al., 2008), the segmented pattern of *Shh* expression was lost from the carapace (Fig. 2D-F), indicating that these pathways interact during the formation of the turtle scutes. Both *Shh* and *Bmp* signaling,

therefore, are necessary for the expression of *Shh* in the scute placode. Like the embryos of *Pelodiscus*, the carapacial ridges of these embryos do not have a contoured outline, which is characteristic of scute development, but rather the carapacial ridge is uniform in structure along its length (Fig. 2E,F). In control embryos, scute placodes were seen as protrusions of the carapacial ridge and were marked by *Shh* expression (Fig. 2D).

We next examined the potential roles of fibroblast growth factor (Fgf) signaling in turtle scute development by culturing *T. scripta* embryos with an inhibitor of FGF receptor (SU5402) (Mandler and Neubüser, 2001; Mohammadi et al., 1997). In these cultures, the regular distribution of marginal *Shh* expression was severely disrupted (Fig. 2G,H), effectively randomizing the placodal patterns (Runs test:  $P=0.17-1$ , except for the left sides of samples 1 and 10,  $P=0.04$  and  $P=0.02$ , respectively, Fig. 2I).

### Dynamics of developing carapacial scutes

*Trachemys scripta*, like most hard-shelled turtles, has 38 carapacial scutes that are grouped into 24 marginal, eight costal, five vertebral and one nuchal scutes (Fig. 3A). We examined the developmental sequence of these scutes from placode initiation to the generation of the final scute pattern of the turtle carapace by using *Bmp2* expression. In the formation of each individual scute, we detected an initial domain of expression that progressively expanded radially, resembling a traveling wave that expanded until it encountered the expression domains of the other scutes. In the development of the marginal scutes, we observed the simultaneous appearance of segmented domains along the carapacial ridge at stage Y14-15 (Fig. 3A). These domains are the thickened placodal epithelium of the future marginal scutes. In the area forming costal scutes, *Bmp2* expression was punctate, initially (Y14-15) in four paired domains corresponding to each scute, and these domains expanded until stage Y19. The vertebral scutes began as paired primordia with punctate *Bmp2* expression at Y15 along the dorsal midline, with the fifth pair

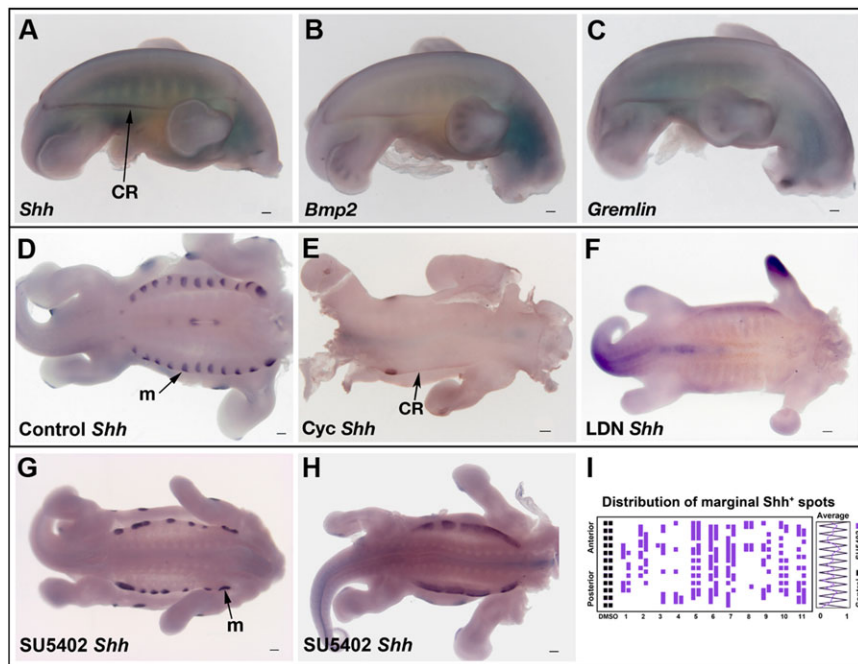

**Fig. 2. Evolutionary and experimental loss of turtle scutes and signaling centers.** Scuteless *Pelodiscus* embryos lack the punctate expression of *Shh* (A), *Bmp2* (B) and *Gremlin* (C), which are expressed in a line along the expanding carapacial ridge. No serrations are seen at the borders of the carapacial ridge (CR). (D-F) Experimental loss of the placodal signaling centers. A control cultured *T. scripta* embryo (D) shows *Shh* expression in the scute placodes along the carapacial ridge (arrows), whereas embryos cultured with the *Shh* signaling inhibitor cyclopamine (Cyc) (E) and the *Bmp* signaling inhibitor LDN193189 (LDN) (F) lose *Shh* expression in these regions. (G-I) Fgf signaling is necessary for scute patterning. (G,H) *T. scripta* embryos cultured with SU5402 show fusions and absences of domains expressing *Shh* along the carapacial ridge. (I) A graphical representation of these samples reveals that the distribution of marginal *Shh* expression shows a great degree of variation in treated turtles compared with the controls (treated with dimethylsulfoxide). Only the left sides of samples 1 and 10 depart from randomness in the SU5402-treated turtles (Runs test). Anterior is toward the right for specimens and toward the top in the graph. Scale bars: 200  $\mu$ m. m, marginal scute primordia.

of vertebral scute primordia being the last to form posteriorly by Y17. The paired vertebral scute primordia began to merge together around stage Y17. The nuchal scute also developed as a pair of primordia at Y16 and fused at later stages. By Y20, each of the carapacial scute primordia had grown radially and was in apposition to its neighboring scutes (Fig. 3A). The regions between scutes, called seams, can leave a depression (sulcus) on the underlying dermal bones.

### A computational model of scute formation and variation

The sequence of scute induction and growth are suggestive of a system that is patterned by Turing mechanisms. Reaction-diffusion dynamics have been hypothesized to be responsible for the patterning of ectodermal appendages, such as hair and feathers (Sick et al., 2006; Painter et al., 2012; Chuong et al., 2013). In those systems, a diffusible extracellular activator signal promotes its own synthesis and the synthesis of an inhibitory extracellular diffusible signal that represses activator synthesis. As a result, a symmetry break occurs and an ordered spatial pattern of homogeneously spaced spots or stripes arises (Koch and Meinhardt, 1994; Kondo and Miura, 2010). To explore whether similar dynamics could account for placodes giving rise to turtle scutes, we constructed a mathematical model of scute formation from an initial set of placodes. The model includes two reaction-diffusion systems, one for the positioning of the initial expression domain of each scute and one for the traveling wave expansion of these expression domains, coupled with growth. Each reaction-diffusion system is based on the basic Meinhardt–Gierer model (Gierer and Meinhardt, 1972). Our model starts from an initial condition in which the first activator ( $A_1$ ;  $t=0$ ) is expressed in 12 spots in the margins (Fig. 3B; supplementary materials and methods). This initial condition follows from the observation of a pre-pattern of 12 marginal scute placodes on each carapacial ridge that we hypothesize to be established by the somites, the segmental units of paraxial mesoderm on either side of the neural tube and notochord in vertebrate embryos (Yntema, 1970; Nagashima et al., 2007; Moustakas, 2008). We identified this pre-pattern with the sequentially alternating expression domains of *Gremlin*-*Shh*-*Bmp* in the carapacial ridge that are shown in Fig. 1B. The first activator-

inhibitor couplet in the model results in the formation of the relative positions of the presumptive scute placodes, comprising two columns of 12 marginal, four costal and six vertebral scutes (the paired nuchal scute primordia are induced as vertebrals, resulting in six pairs of ‘vertebral’ scutes; Fig. 3B). The placodal pattern induces the second reaction-diffusion system, which creates the final scute architecture as a result of activator and inhibitor traveling waves that propagate from the scute signaling centers (Fig. 3B; supplementary material Fig. S3, supplementary materials and methods). The simulations show that the model closely approximates the processes of scute formation in our data (Fig. 3; supplementary material Movie 2A,B), suggesting that the mechanisms underlying turtle scute formation are consistent with the two phases of activator-inhibitor dynamics in a growing domain.

### Testing the model on scute patterning

To test experimentally our mathematical model of scute formation, we cultured *Trachemys* embryos at various stages with beads that had been soaked in proteins of potential activators or inhibitors in our system. We found the timing and location of bead placement to be important variables in determining the appearance of a phenotypic response, and variant phenotypes were only observed in cultures where beads were placed, at least, slightly off-center from the midline (Fig. 4; supplementary material Figs S4 and S5). Placing a bead soaked in human recombinant SHH protein on explants before the final array of scute placodes were induced – i.e. during the activity of the first reaction-diffusion system (Y15-16) – induced a clustering of smaller additional spots of *Shh* expression adjacent to the bead (Fig. 4Ai). In the model, we can simulate the ectopic addition of local sources of hypothetical activator, inhibitor or their upstream regulator proteins (supplementary material Fig. S4). We found that placing an ectopic source of a hypothetical inhibitor of the inhibitor of the first reaction-diffusion system mimicked the phenotype seen in our early SHH bead cultures (Fig. 4Aii), suggesting that SHH is an (indirect) activator in the first reaction-diffusion system (Fig. 4A; supplementary material Fig. S4). By contrast, a similarly placed bead soaked in human recombinant FGF4 protein during the activity of the first reaction-diffusion

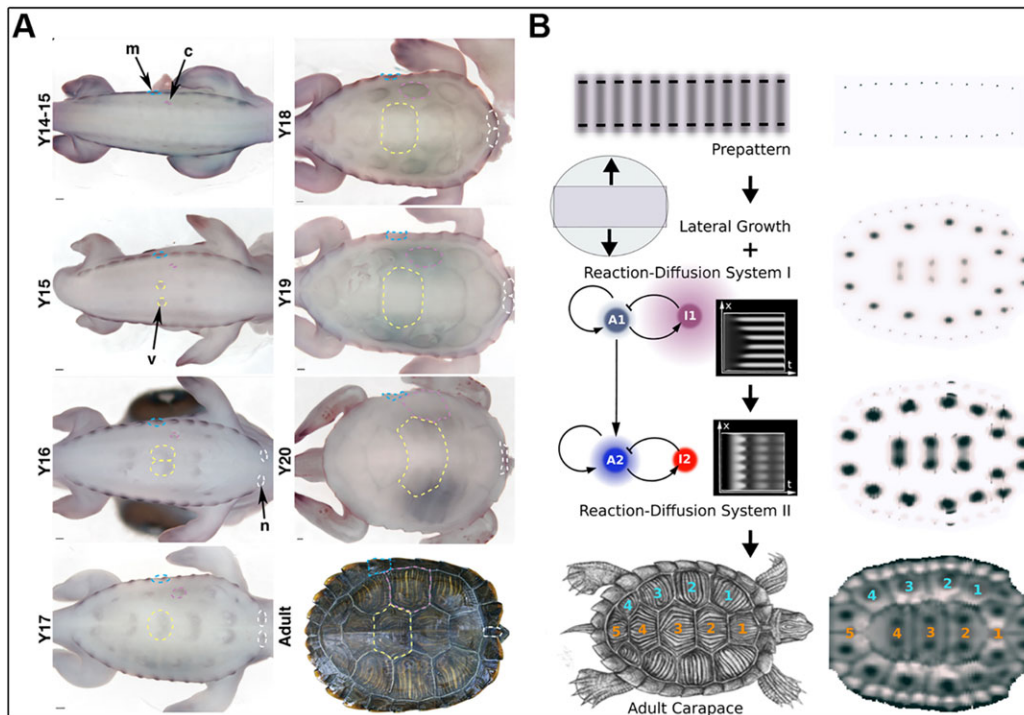

**Fig. 3. Dynamics of carapacial scute formation in *T. scripta* visualized using *in situ* hybridization and as a mathematical model.** (A) Following the formation of the carapacial ridge, by using *in situ* hybridization, we observed that *Bmp2* is expressed segmentally in the developing marginal (m, blue outline) scutes; expression is also seen in the costal (c, pink outline) scute primordia. Around Y15, expression is seen in the paired vertebral (v, yellow outline) scute primordia. At stage Y16, expression is seen in the paired nuchal (n, white outline) scute primordia. At later stages, *Bmp2* expression is seen at the anterior margins of the developing scutes. Expression is also seen in the developing scales of the limbs and tail (Y20). Fully differentiated keratinized *T. scripta* scutes are seen in the adult specimen (photo credit of adult specimen: Bob Smither). Anterior is toward the right. For illustrative purposes, dashed outlines followed scute primordia through the stages. Scale bars: 200  $\mu\text{m}$ . (B) Hypothesis of scute pattern formation and dynamics of its implementation in a mathematical model. From a pre-pattern of 24 marginal spots, as set by the somites, a first reaction diffusion system ( $A_1$ , activator;  $I_1$ , inhibitor) is induced, whose steady state is a stable Turing pattern of 38 spots. The small  $x$ - $y$  plot insert depicts the spatio-temporal dynamics of Turing pattern formation ( $x$ -axis, time;  $y$ -axis, position; white, concentration of activator; arbitrary units). This pattern induces a second reaction-diffusion system with different parameters ( $A_2$ , activator;  $I_2$ , inhibitor). In addition, we include lateral outgrowth of the carapace, which is seen to occur concomitantly. This is represented by a gray square growing progressively to an ellipsoid, as the arrows indicate. Finally, the second reaction-diffusion system produces the outlines of the 38 adult carapacial scutes by a spatiotemporally unstable traveling-wave mechanism (dynamics shown as  $x$ - $y$  time-space plot insert). The seams between the scutes are suggested to form where traveling waves of  $A_2$  or  $I_2$  collide. On the right side, activator concentrations in model simulations are plotted for  $A_1, t=0$ ;  $A_1, t=230,000$ ;  $A_2, t=236,000$ ;  $A_2, t=240,000$  (from top to bottom). The final scute architecture is generated by traveling waves, resulting in 24 marginal, eight costal and six vertebral (five vertebral plus one nuchal) scutes, as seen in *T. scripta*. Vertebral scutes are numbered in orange, costal scutes in blue. *T. scripta* adult carapace illustration by Tiff Shao.

system results in the local absence of *Shh* expression (Fig. 4Aiii). Combining this result with our model simulations, we hypothesize that FGF4 is acting as an inhibitor (or the activator of an inhibitor) in the first reaction-diffusion system (Fig. 4Aiv). These experiments and simulations, therefore, suggest that *Shh* and *Fgf* signaling act in the first reaction-diffusion system of the model that normally produces a regularly patterned array of 38 scute placodes. Placing a bead soaked in SHH protein later in development, during the activity of the second reaction-diffusion system (Y17), results in the production of a supernumerary scute adjacent to or underneath the bead (Fig. 4B). The induction of a supernumerary scute, combined with simulation data (Fig. 4B; supplementary material Figs S4 and S5), suggests that SHH is acting as an activator in the second reaction-diffusion system.

Many turtles show anomalous intra-species variation, including supernumerary and fused scutes (Coker, 1910; Yntema, 1970). Some of our embryos show anomalous patterns in the distribution of scute primordia (as shown by *Bmp2* expression; Fig. 4C), corresponding to the documented adult patterns, including supernumerary misplaced scutes and a zigzag pattern of unfused vertebral scutes (Fig. 4C). To explore whether these phenotypic anomalies could also be produced by our model, we performed a variational analysis by systematically

changing the model parameters and comparing the resulting phenotypes. These parameters were changed independently in each of the reaction-diffusion systems because they involve different or differently regulated signals (supplementary material Fig. S6, supplementary materials and methods). All changes in the parameters of the reaction-diffusion system in the model resulted in changes that were symmetrical with respect to the right and left halves of the carapace, and, therefore, did not produce asymmetric scute patterns, which were seen in intra-specific variants. Furthermore, adding moderate gene expression noise did not reproduce these variants; such noise only slightly blurred the spots that formed by reaction-diffusion dynamics but did not randomize their positions. Morphological patterns resembling naturally occurring anomalies arose in the model, however, by hemispheric offsets in the marginal placodes or growth asymmetry (Fig. 4C; supplementary material Figs S7 and S8).

Finally, most hard-shelled turtles have the same number of carapacial scutes as *T. scripta*. Loggerhead (*Caretta caretta*) and ridley sea turtles (*Lepidochelys olivacea* and *Lepidochelys kempii*), however, have five and six to seven pairs of costal scutes, respectively, and show a greater range of variation in scute numbers naturally (Bull and Vogt, 1979; Mast and Carr, 1989). These species vary in their

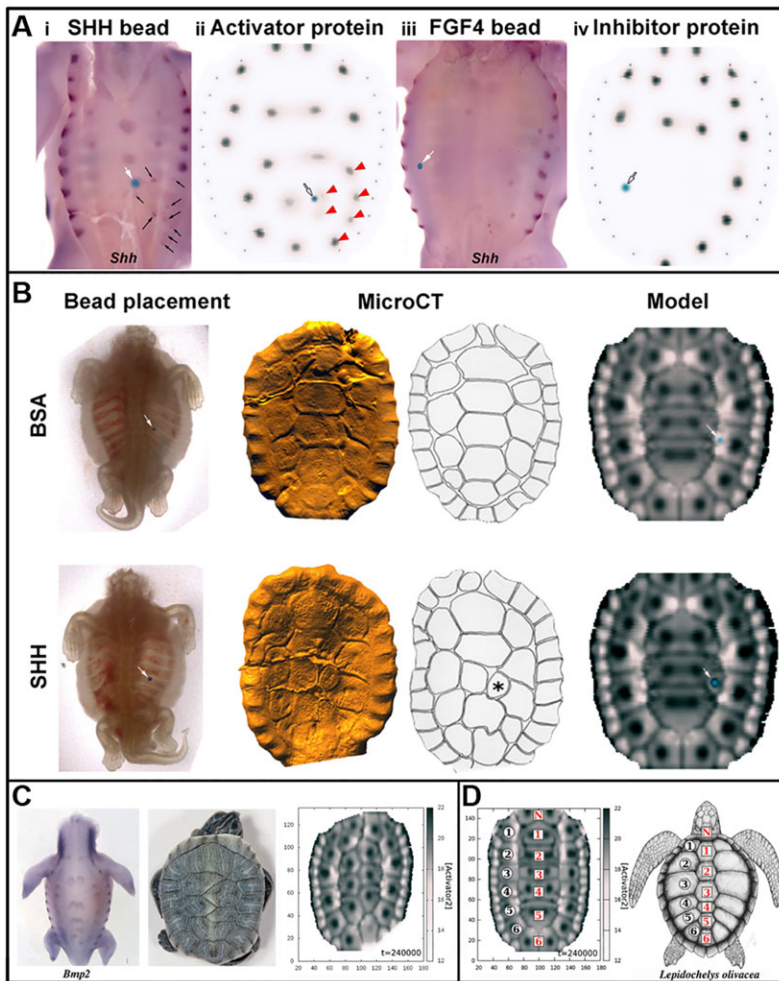

**Fig. 4. Testing the model on scute patterning.** (A,B) The role of proteins in scute pattern formation can be tested by implanting protein-coated beads as an additional source of diffusible protein both *in vitro* and *in silico*. (A) Early (Y15-16) implantation of a SHH-coated bead (Ai) causes a number of small and narrowly spaced *Shh* spots (black arrows) to arise adjacent to the bead after culture, as visualized by *in situ* hybridization. A similar pattern is produced by the ectopic addition of an inhibitor of  $I_1$  (i.e. an indirect activator) in the model (Aii;  $A_1$ ,  $t=210,000$ ; red arrowheads). By contrast, implantation of an FGF4-coated bead (Aiii) results in a large field with no *Shh* spot formation. In the model, the addition of a source of activator of  $I_1$  (i.e. an inhibitor) prevents spot formation in an area around the bead, the size of which depends on the concentration and the diffusion rate used (Aiv;  $A_1$ ,  $t=210,000$ ). (B) Late (Y17) implantations of a SHH-coated bead results in the formation of a supernumerary scute, compared with the addition of a bovine serum albumin-coated (control) bead. The cultures (left) show bead placement at the time of implantation, and the resulting cultures were analyzed using micro-computed tomography (MicroCT) scans (center panel shows 3D scan and line drawing). The results of model simulations (A<sub>2</sub>,  $t=240,000$ ) for control and bead experiments with an additional source of  $I_2$  (i.e. an inhibitor) are illustrated (right). The locations of beads on cultures and ectopic sources of protein in simulations are shown by white arrows. (C,D) Mathematical models of abnormal and natural variation in turtle scute patterns. (C) Scute variation occurs spontaneously in natural populations of turtles (left). Similar variation in scute patterns is also observed occasionally in embryonic specimens (revealed by *Bmp2* expression, middle). This anomalous variation can be produced by the introduction of a hemispheric offset into the model (right). (D) Elongating the initial anterior-posterior axis in the model produces additional costal and sometimes vertebral scutes, as seen in *L. olivacea*. Anterior is towards the top. Vertebral scutes are numbered in red, costal scutes in black. N, nuchal. Time is given in simulation steps. *L. olivacea* illustration by Tiff Shao.

numbers of marginal scutes, and *Lepidochelys* often have a greater number of vertebral scutes (Fig. 4D). Our computational model was able to reproduce variation that was consistent with this interspecific variation. The most parsimonious way to change the number of scutes symmetrically is by changing the length of the anterior-posterior axis, either by increasing or decreasing the longitudinal carapacial area; as a consequence, the number of costal and vertebral scutes became modified (Fig. 4D; supplementary material Fig. S9).

## DISCUSSION

In this study we provide evidence that the scutes of the turtle shell originate from the formation of a patterned array of signaling modules on the carapace and plastron, and that this set of developmental modules was modified in the evolution of turtle scutes to accommodate their planar growth.

Although ectodermal appendages are very different morphologically, the early steps of their morphogenesis are regulated by several relatively well-characterized signaling pathways including the transforming growth factor  $\beta$  (Tgf $\beta$ ), Hh, Fgf and Wnt families, and their downstream transcription factors (Pispa and Thesleff, 2003). First we examined ectodermal placodal markers *Bmp2*, *Bmp4*, the Bmp target gene *Msx2*, the Bmp antagonist *Gremlin* and *Shh* in turtle embryos because research on birds and alligators has implicated Bmp and Shh signaling in regulating feather and scale development at various stages (Nohno et al., 1995; Noramly and Morgan, 1998; Harris et al., 2002; Bardot et al., 2004). Previously, we had found several of these genes to be

expressed in the developing dermatomes of *T. scripta*; however, their role in scute development was not investigated (Moustakas, 2008). Our results showing the expression of these genes in developing turtle scutes reveal that scute placodes express the same sets of genes as the placodes for alligator scales and avian scales and feathers, in which there are adjacent expression domains of *Bmp2* anteriorly and *Shh* posteriorly in each placode (Harris et al., 2002). However, in scales and feathers, these domains are separate, whereas in the scutes, they partially overlap.

Furthermore, unlike the development of feathers, hair and teeth, where the mesenchyme forms a pronounced dermal condensate directly under the thickened epithelium, the mesenchyme of the developing scutes appears to be condensed uniformly along the carapacial ridge (Fig. 1A).

Our experimental data demonstrate that Shh and Bmp signaling are necessary for the formation of the scutes of the turtle shell and that Fgf signaling is necessary for the segmented distribution of *Shh* expression in the marginal scute placodes (Fig. 2). These results are in agreement with the proposed integration of the Shh- and Bmp-mediated signaling pathways in the morphogenesis (Nohno et al., 1995; Noramly and Morgan, 1998; Harris et al., 2002) and spacing (Noramly and Morgan, 1998; Bardot et al., 2004) of the placodes during feather and scale development. Similarly, Fgf signaling has been implicated in the patterning of feathers (Mandler and Neubüser, 2004; Song et al., 2004; Wells et al., 2012), and we have previously shown *Fgf8* and *Fgf10* to be expressed in the developing carapace of *T. scripta* (Loredo et al., 2001; Cebra-Thomas et al., 2005).

We hypothesize that the loss of the placodes led to the evolutionary loss of the epidermal scutes in soft-shelled turtles, an adaptation that permits dermal breathing and adaptive muscular control of the shape of the shell in such soft-shelled turtles (Dunson, 1960; Wang et al., 1989). We note that the expression patterns along the carapacial ridge of *Pelodiscus* resemble that of *Gremlin* in *T. scripta* before scute development is initiated (Moustakas, 2008), suggesting that scute development in *Pelodiscus* is arrested before patterned expression of *Shh* and *Bmp* genes.

The positioning of placodes and their posterior expansion is consistent with a two-phase reaction-diffusion system with growth (Fig. 3), and our hypotheses implicating *Shh* signaling in the reaction-diffusion dynamics of turtle scute formation are consistent with the patterning of other vertebrate organ systems, such as the teeth, palatal rugae and limbs (Cho et al., 2011; Economou et al., 2012; Sheth et al., 2012). Reaction-diffusion systems have also been proposed to play a role in the development of other ectodermal appendages. However, unlike feathers and hair, which have adopted a proximal-distal mode of growth from an ancestral scale (Maderson, 1972), turtle scutes grow radially and might require a second reaction-diffusion system to form their final shape of interlocking modules.

Turtle scute patterns show a paradox as being highly conserved between groups of turtles but having a great individual variety within each group of turtles (Zangerl and Johnson, 1957; Zangerl, 1969). Scute anomalies have been attributed to mechanical stresses (Yntema, 1970), such as those produced by desiccation (Coker, 1910), high temperature (Gardner Lynn and Ullrich, 1950) and environmental pollution (Bujes and Verrastro, 2007). Based on the simulation experiments of our computational model (Fig. 4), we hypothesize that these environmental stresses are translated into asymmetric growth in the embryo. Interestingly, because scute anomalies have been documented to occur more often in females (Gardner Lynn and Ullrich, 1950), and because most turtles have temperature-dependent sex determination in which higher temperatures yield females (Van Meter et al., 2006), high temperatures might be a factor disturbing the placodal pre-pattern. Finally, we were also able to reproduce the natural variation seen in marine turtles, which have a wider range in the number of scutes than most hard-shelled turtles.

Taken together, the development, the loss, and the variation within and between species of turtle scutes suggest how evolutionary novelties arise and how they can be modified to produce new variants.

## MATERIALS AND METHODS

### Embryos and staging

*Trachemys scripta elegans* eggs were collected from commercial turtle farms in Louisiana, USA. Eggs were incubated in a 1:1 mix of water and vermiculite (w/v) at room temperature. Embryos were fixed in 4% paraformaldehyde (PFA) and dehydrated stepwise into 100% methanol for whole-mount *in situ* hybridization. Embryos used for section *in situ* hybridization were fixed in a formol-alcohol fixative and dehydrated stepwise to 100% ethanol. *Pelodiscus sinensis* embryos fixed in 4% PFA and stored in 100% methanol were kindly provided by Drs Hiroshi Nagashima and Shigeru Kuratani (RIKEN CDB). Embryos were staged as described previously (Tokita and Kuratani, 2001; Yntema, 1968).

### *In situ* hybridization and 3D reconstructions

Probes and the *in situ* hybridization performed were essentially as described by Moustakas (Moustakas, 2008) with the following modifications for the whole-mount *in situ* hybridization: glycine [2 mg/ml in phosphate-buffered saline with Tween (PBST)] was used to stop the Proteinase K reaction; 1% SDS was substituted for 0.1% Tween-20 in the hybridization buffer; following hybridization and RNase A treatment, embryos were washed in 5× SSC/50% formamide/1% SDS six times for 30 minutes each; and embryos

were washed in PBST following anti-digoxigenin incubation rather than MABT. For 3D reconstructions of gene expression, alternating sections (10 μm) of the same individual placodes were placed on separate slides followed by *in situ* hybridization. The gene expression was delineated in sections using Pixelmator (<http://www.pixelmator.com/>) and 3D images were reconstructed using ImageJ 1.43 (<http://rsbweb.nih.gov/ij/>). Owing to differences in probes, the expression patterns should be considered approximate. For each placode, four to six sections were obtained for each probe.

### X-ray micro-computed tomography

*Trachemys* embryos were fixed with 4% PFA, dehydrated into 70% ethanol and dyed with phosphotungstic acid (#P4006, Sigma), which allows detection of differences in soft tissue densities, for 24 h (Metscher, 2009). The samples were scanned using a custom-built μCT system Nanotom 180 NF (phoenix|x-ray Systems+Services) with a CMOS flat-panel detector (Hamamatsu Photonics) and a high-power transmission-type X-ray nanofocus source with a tungsten anode. The samples were imaged with 80 kV acceleration voltage and 180 μA tube current. Projection images were acquired over a full circle of rotation with 0.3° angular interval, and each projection image was composed of the average of 10 transmission images with a 500 ms exposure time. The measurement geometry resulted in an effective voxel size of 5 μm. The reconstruction from the projection images was performed with reconstruction software *datos|x rec* supplied by the system manufacturer. The reconstruction was then downsampled to 10 μm voxel resolution and Avizo Fire 6.3 was used to render the 3D image and movie.

### *In vitro* cultures

Explants were prepared and cultured as previously described (Cebra-Thomas et al., 2005). Stage Y15-16 *Trachemys* embryos were dissected free of extraembryonic tissues in HBSS, decapitated, split along the midline and eviscerated. The explants were cultured ventral-side down on Transwell-clear 3 μm nucleopore membranes (Corning-Costar) over DME supplemented with 2% FCS, gentamycin, fungazone and nystatin (Sigma). Control cultures were supplemented with dimethyl sulfoxide (DMSO, Sigma) and hydroxypropylcyclodextrin (HPCD, Sigma).

For inhibition of hedgehog signaling, cyclopamine (C988400, Toronto Research Chemicals) was diluted in 45% w/v hydroxypropylcyclodextrin (HPCD, Sigma) and 10 μg was applied directly to the experimental explants. For inhibition of *Bmp* signaling, explants were treated with 10 μM LDN-193189 (Stemgent). For inhibition of *Fgf* signaling, explants were treated with 10 μM SU5402 (SU-GEN).

Protein-coated beads were added to explants (stage Y15-16 or Y17) with forceps to test the effects of ectopic protein sources on the development of scutes. Affi-gel blue beads (Bio-Rad) were washed with PBS and soaked for 1 h at 37°C in recombinant proteins (1 mg/ml SHH; 1 mg/ml BMP2; R&D) or bovine albumin serum (BSA). The same procedure was followed using heparin agarose beads (MCLABs) for recombinant FGF4 protein (1 mg/ml; R&D). The explants were cultured for 5 days at 30°C with 5% CO<sub>2</sub>. We used Run test and Monte Carlo simulations (using PAST, [http://folk.uio.no/ohammer/past/index\\_old.html](http://folk.uio.no/ohammer/past/index_old.html)) to test whether the marginal patterns of *Shh* expression differed from randomness after SU5402 treatments. In these tests, the turtles were assumed to have 23 domains that either were *Shh* positive or negative.

The cultured explants were fixed in 4% PFA, dehydrated in 100% methanol and processed for *in situ* hybridization or X-ray micro-computed tomography. For μCT, the samples were imaged over a full 360° with an angular step of 0.5°, and each projection image was composed of an average of 8500 ms exposures. The measurement geometry resulted in an effective voxel size of 2 μm/vox.

### Computational model of turtle scute development

The computational model of turtle scute development (available with the source code at <http://dead.ctlulhu.fi/turtlem/>) implements two coupled reaction-diffusion systems and growth in a two-dimensional epithelium representing the developing carapace. Each reaction-diffusion system includes two diffusible extracellular molecules, the kinetics of which are derived from the classic Meinhardt-Gierer equations (Gierer and Meinhardt, 1972). Gnuplot (<http://www.gnuplot.info/>) was used to plot the simulation output. Morphospace was explored by varying model parameters. Further details can be found in the supplementary materials and methods.

## Acknowledgements

We thank K. Padian, I. Thesleff, J. Wyneken, G. Cherepanov, J. Parham, I. Salvador Martínez, K. MacCord, V. Moustakas and P. Holroyd for discussions; A. Vihera, R. Savolainen, J. Garten, A. Stager, K. Verho, T. Kankaanpää, T. Häkkinen and M. Holopainen for technical assistance; H. Nagashima and S. Kuratani for staged *Pelodiscus sinensis* embryos; Tiff Shao for illustrations; Bob Smither for the photograph of the adult *T. scripta* specimen.

## Competing interests

The authors declare no competing financial interests.

## Author contributions

J.E.M.-V. and J.C.-T. acquired specimens and performed culture experiments; J.E.M.-V. and N.K.S. performed gene expression studies; A.K., J.E.M.-V. and K.H. designed and performed the micro-computed tomography experiments; R.Z. and I.S.-C. designed the model and R.Z. implemented it; K.M. participated in designing the project; J.E.M.-V., R.Z., I.S.-C., S.F.G. and J.J. designed the project and wrote the paper.

## Funding

This study was funded by the Academy of Finland; National Science Foundation [RUI-0748508 and DEB-0408163]; Millersville University; a Development Travelling Fellowship; and The Company of Biologists.

## Supplementary material

Supplementary material available online at <http://dev.biologists.org/lookup/suppl/doi:10.1242/dev.109041/-/DC1>

## References

- Alibardi, L. (2005). Proliferation in the epidermis of chelonians and growth of the horny scutes. *J. Morphol.* **265**, 52-69.
- Alibardi, L. (2006). Ultrastructural and immunohistochemical observations on the process of horny growth in chelonian shells. *Acta Histochem.* **108**, 149-162.
- Bardot, B., Lecoin, L., Fliniaux, I., Huillard, E., Marx, M. and Viallet, J. P. (2004). Drm/Gremlin, a BMP antagonist, defines the interbud region during feather development. *Int. J. Dev. Biol.* **48**, 149-156.
- Bujes, C. S. and Verrastro, L. (2007). Supernumerary epidermal shields and carapace variation in Orbigny's slider turtles, *Trachemys dorbigni* (Testudines, Emydidae). *Revista Brasileira de Zoologia* **24**, 666-672.
- Bull, J. J. and Vogt, R. C. (1979). Temperature-dependent sex determination in turtles. *Science* **206**, 1186-1188.
- Burke, A. C. (1989). Development of the turtle carapace: implications for the evolution of a novel bauplan. *J. Morphol.* **199**, 363-378.
- Cebra-Thomas, J., Tan, F., Sistla, S., Estes, E., Bender, G., Kim, C., Riccio, P. and Gilbert, S. F. (2005). How the turtle forms its shell: a paracrine hypothesis of carapace formation. *J. Exp. Zool. B Mol. Dev. Evol.* **304B**, 558-569.
- Chen, J. K., Taipale, J., Cooper, M. K. and Beachy, P. A. (2002). Inhibition of Hedgehog signaling by direct binding of cyclopamine to Smoothened. *Genes Dev.* **16**, 2743-2748.
- Cherepanov, G. O. (2006). Ontogenesis and evolution of horny parts of the turtle shell. *Fossil Turtle Res.* **1**, 19-33.
- Cho, S.-W., Kwak, S., Woolley, T. E., Lee, M.-J., Kim, E.-J., Baker, R. E., Kim, H.-J., Shin, J.-S., Tickle, C., Maini, P. K. et al. (2011). Interactions between Shh, Sostdc1 and Wnt signaling and a new feedback loop for spatial patterning of the teeth. *Development* **138**, 1807-1816.
- Chuong, C.-M., Yeh, C.-Y., Jiang, T.-X. and WidELITZ, R. (2013). Module-based complexity formation: periodic patterning in feathers and hairs. *Wiley Interdiscip. Rev. Dev. Biol.* **2**, 97-112.
- Coker, R. E. (1910). Diversity in the scutes of Chelonia. *J. Morph.* **21**, 1-75.
- Cuny, G. D., Yu, P. B., Laha, J. K., Xing, X., Liu, J.-F., Lai, C. S., Deng, D. Y., Sachidanandan, C., Bloch, K. D. and Peterson, R. T. (2008). Structure-activity relationship study of bone morphogenetic protein (BMP) signaling inhibitors. *Bioorg. Med. Chem. Lett.* **18**, 4388-4392.
- Dunson, W. A. (1960). Aquatic respiration in *Trionyx spinifer asper*. *Herpetologica* **16**, 227-283.
- Economou, A. D., Ohazama, A., Porntaveetus, T., Sharpe, P. T., Kondo, S., Basson, M. A., Grilli-Linde, A., Cobourne, M. T. and Green, J. B. A. (2012). Periodic stripe formation by a Turing mechanism operating at growth zones in the mammalian palate. *Nat. Genet.* **44**, 348-351.
- Gaffney, E. S. (1990). The comparative osteology of the Triassic turtle *Proganochelys*. *Bull. Amer. Mus. Nat. Hist.* **194**, 1-263.
- Gardner Lynn, W. and Ullrich, M. C. (1950). Experimental production of shell abnormalities in turtles. *Copeia* **4**, 253-262.
- Gierer, A. and Meinhardt, H. (1972). A theory of biological pattern formation. *Kybernetik* **12**, 30-39.
- Harris, M. P., Fallon, J. F. and Prum, R. O. (2002). Shh-Bmp2 signaling module and the evolutionary origin and diversification of feathers. *J. Exp. Zool.* **294**, 160-176.
- Hirasawa, T., Nagashima, H. and Kuratani, S. (2013). The endoskeletal origin of the turtle carapace. *Nat. Commun.* **4**, 2107.
- Kawashima-Ohya, Y., Narita, Y., Nagashima, H., Usuda, R. and Kuratani, S. (2011). Hepatocyte growth factor is crucial for development of the carapace in turtles. *Evol. Dev.* **13**, 260-268.
- Koch, A. J. and Meinhardt, H. (1994). Biological pattern formation: from basic mechanisms to complex structures. *Rev. Mod. Phys.* **66**, 1481-1507.
- Kondo, S. and Miura, T. (2010). Reaction-diffusion model as a framework for understanding biological pattern formation. *Science* **329**, 1616-1620.
- Kuratani, S., Kuraku, S. and Nagashima, H. (2011). Evolutionary developmental perspective for the origin of turtles: the folding theory for the shell based on the developmental nature of the carapacial ridge. *Evol. Dev.* **13**, 1-14.
- Li, C., Wu, X.-C., Rieppel, O., Wang, L.-T. and Zhao, L.-J. (2008). An ancestral turtle from the Late Triassic of southwestern China. *Nature* **456**, 497-501.
- Loredto, G. A., Brukman, A., Harris, M. P., Kagle, D., Leclair, E. E., Gutman, R., Denney, E., Henkelman, E., Murray, B. P., Fallon, J. F. et al. (2001). Development of an evolutionarily novel structure: fibroblast growth factor expression in the carapacial ridge of turtle embryos. *J. Exp. Zool.* **291**, 274-281.
- Maderson, P. F. A. (1972). On how an archosaurian scale might have given rise to an avian feather. *Amer. Nat.* **106**, 424-428.
- Mandler, M. and Neubüser, A. (2001). FGF signaling is necessary for the specification of the odontogenic mesenchyme. *Dev. Biol.* **240**, 548-559.
- Mandler, M. and Neubüser, A. (2004). FGF signaling is required for initiation of feather placode development. *Development* **131**, 3333-3343.
- Mast, R. B. and Carr, J. L. (1989). Carapacial scute variation in Kemp's ridley sea turtle (*Lepidochelys kempi*) hatchlings and juveniles. In *Proceedings of the First International Symposium on Kemp's Ridley Sea Turtle Biology, Conservation and Management* (ed. C. W. Caillouet, Jr and A. M. Landry), pp. 202-219. Texas: A & M University Sea Grant. TAMU-SG-89-105.
- Metscher, B. D. (2009). MicroCT for comparative morphology: simple staining methods allow high-contrast 3D imaging of diverse non-mineralized animal tissues. *BMC Physiol.* **9**, 11.
- Mohammadi, M., McMahon, G., Sun, L., Tang, C., Hirth, P., Yeh, B. K., Hubbard, S. R. and Schlessinger, J. (1997). Structures of the tyrosine kinase domain of fibroblast growth factor receptor in complex with inhibitors. *Science* **276**, 955-960.
- Moustakas, J. E. (2008). Development of the carapacial ridge: implications for the evolution of genetic networks in turtle shell development. *Evol. Dev.* **10**, 29-36.
- Nagashima, H., Kuraku, S., Uchida, K., Ohya, Y. K., Narita, Y. and Kuratani, S. (2007). On the carapacial ridge in turtle embryos: its developmental origin, function and the chelonian body plan. *Development* **134**, 2219-2226.
- Nohno, T., Kawakami, Y., Ohuchi, H., Fujiwara, A., Yoshioka, H. and Noji, S. (1995). Involvement of the Sonic hedgehog gene in chick feather formation. *Biochem. Biophys. Res. Commun.* **206**, 33-39.
- Noramly, S. and Morgan, B. A. (1998). BMPs mediate lateral inhibition at successive stages in feather tract development. *Development* **125**, 3775-3787.
- Painter, K. J., Hunt, G. S., Wells, K. L., Johansson, J. A. and Headon, D. J. (2012). Towards an integrated experimental-theoretical approach for assessing the mechanistic basis of hair and feather morphogenesis. *Interface Focus* **2**, 433-450.
- Pispa, J. and Thesleff, I. (2003). Mechanisms of ectodermal organogenesis. *Dev. Biol.* **262**, 195-205.
- Sánchez-Villagra, M. R., Müller, H., Sheil, C. A., Scheyer, T. M., Nagashima, H. and Kuratani, S. (2009). Skeletal development in the Chinese soft-shelled turtle *Pelodiscus sinensis* (Testudines: Trionychidae). *J. Morphol.* **270**, 1381-1399.
- Sheth, R., Marcon, L., Bastida, M. F., Junco, M., Quintana, L., Dahn, R., Kmita, M., Sharpe, J. and Ros, M. A. (2012). *Hox* genes regulate digit patterning by controlling the wavelength of a Turing-type mechanism. *Science* **338**, 1476-1480.
- Sick, S., Reinker, S., Timmer, J. and Schlake, T. (2006). WNT and DKK determine hair follicle spacing through a reaction-diffusion mechanism. *Science* **314**, 1447-1450.
- Song, H.-K., Lee, S.-H. and Goetinck, P. F. (2004). FGF-2 signaling is sufficient to induce dermal condensations during feather development. *Dev. Dyn.* **231**, 741-749.
- Tokita, M. and Kuratani, S. (2001). Normal embryonic stages of Chinese soft-shelled turtle *Pelodiscus sinensis* (Trionychidae). *Zool. Sci.* **18**, 705-715.
- Van Meter, R. J., Spotila, J. R. and Avery, H. W. (2006). Polycyclic aromatic hydrocarbons affect survival and development of common snapping turtle (*Chelydra serpentina*) embryos and hatchlings. *Environ. Pollut.* **142**, 466-475.
- Wang, Z.-X., Sun, N.-Z. and Sheng, W.-F. (1989). Aquatic respiration in soft-shelled turtles, *Trionyx sinensis*. *Comp. Biochem. Physiol.* **92**, 593-598.
- Wells, K. L., Hadad, Y., Ben-Avraham, D., Hillel, J., Cahaner, A. and Headon, D. J. (2012). Genome-wide SNP scan of pooled DNA reveals nonsense mutation in FGF20 in the scaleless line of featherless chickens. *BMC Genomics* **13**, 257.
- Yntema, C. L. (1968). A series of stages in the embryonic development of *Chelydra serpentina*. *J. Morph.* **125**, 219-251.
- Yntema, C. L. (1970). Extirpation experiments on embryonic rudiments of the carapace of *Chelydra serpentina*. *J. Morph.* **132**, 235-243.
- Zangerl, R. (1969). The turtle shell. In *Biology of the Reptilia Vol. 1* (ed. C. Gans), pp. 311-339. New York: Academic Press.
- Zangerl, R. and Johnson, R. G. (1957). The nature of shield abnormalities in the turtle shell. *Fieldiana Geol.* **10**, 341-362.
